# Supplementary material for: Highly fluorinated cyclodextrins and their host–guest interactions
Source: Royal Society of Chemistry journal article supplement (doi:10.1039/c0cc00616e), 2010-01-01
Supplement: c0cc00616e.pdf [file c0cc00616e.pdf]

## **ELECTRONIC SUPPLEMENTARY INFORMATION**

# **Highly Fluorinated Cyclodextrins and their Host-Guest Interactions**

Maria M. Becker and Bart Jan Ravoo

*Organic Chemistry Institute, Westfälische Wilhelms-Universität Münster,  
Corrensstrasse 40, 48149 Münster, Germany*

*E-Mail: [b.j.ravoo@uni-muenster.de](mailto:b.j.ravoo@uni-muenster.de)*

## Synthesis

### Synthesis of 6-chloro-6-deoxy-cyclodextrins 1a – 1c

The synthesis of perchlorinated cyclodextrins was accomplished as described by Guillo et al.<sup>1</sup> To a solution of 1 eq of cyclodextrin dissolved in DMF, 5.2 eq methylsulfonylchloride per glucose unit of the cyclodextrin is added and stirred at 65 °C for 4 d. The solution is concentrated, the residue is dissolved in methanol and neutralized with 3 M sodium methoxide. The product was precipitated in ice water, filtered out and washed with methanol. The product was vacuum-dried at 55 °C and was obtained as white solid.

### Hexakis-(6-chloro-6-deoxy)- $\alpha$ -cyclodextrin 1a

Cyclodextrin **1a** was synthesized as described above with  $\alpha$ -cyclodextrin (10.52 g, 10.81 mmol) and methylsulfonyl chloride (26.01, 335.6 mmol).

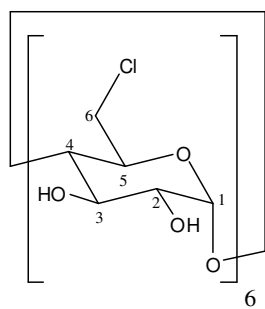

**1a**

Empirical formula (MW in g/mol): C<sub>36</sub>H<sub>54</sub>O<sub>24</sub>Cl<sub>6</sub> (1083.52)

Yield: 78 % (9.19 g, 8.48 mmol)

MS (ESI, MeOH): 560,04 [M + Ca]<sup>2+</sup>, 1103.10  
[M + Na]<sup>+</sup>, 2183.22 [2 M + Na]<sup>+</sup>

<sup>1</sup>H NMR (400 MHz, DMSO)  $\delta$  5.76 (d,  $J$  = 5.4, 1H, 2-OH), 5.59 (s, 1H, 3-OH), 4.92 (d,  $J$  = 3.2, 1H, 1-H), 4.13 – 3.89 (m, 2H, 5-H, 3-H), 3.90 – 3.71 (m, 2H, 4-H, 2-H), 3.44 (t,  $J$  = 8.9, 1H, 6a-H), 3.36 (s, 2H, 6b-H).

<sup>13</sup>C NMR (101 MHz, DMSO)  $\delta$  101.92 (1-C), 83.60 (4-C), 72.65 (3-C), 71.64 (2-C), 70.83 (5-C), 45.30 (6-C).

<sup>1</sup> F. Guillo, B. Hamelin, L. Jullien, J. Canceill, J. M. Lehn, L. de Robertis and H. Driguez, *Bull. Soc. Chim. Fr.*, 1995, **132**, 857.

### Heptakis-(6-chloro-6-deoxy)- $\beta$ -cyclodextrin **1b**

Cyclodextrin **1b** was synthesized as described above with  $\beta$ -cyclodextrin (10.04 g, 8.81 mmol) and methylsulfonyl chloride (24.8, 230 mmol).

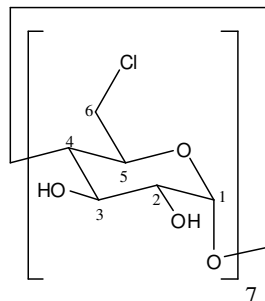

**1b**

Empirical formula (MW in g/mol): C<sub>42</sub>H<sub>63</sub>O<sub>28</sub>Cl<sub>7</sub> (1264.10)

Yield: 89 % (9.86 g, 7.80 mmol)

MS (ESI, MeOH): 1287.12 [M + Na]<sup>+</sup>, 1919.19  
[3 M + 2 Na]<sup>2+</sup>

<sup>1</sup>H NMR (300 MHz, DMSO)  $\delta$  6.00 (d,  $J$  = 6.6, 1H, 2-OH), 5.85 (d,  $J$  = 1.5, 1H, 3-OH), 4.96 (d,  $J$  = 3.5, 1H, 1-H), 4.13 – 4.02 (m, 1H, 5-H), 3.91 – 3.70 (m, 2H, 3-H, 4-H), 3.60 (dt,  $J$  = 8.5, 6.9, 1H, 6a-H), 3.42 – 3.29 (m, 3H, 2-H, 6b-H).

<sup>13</sup>C NMR (75 MHz, DMSO)  $\delta$  102.08 (1-C), 83.62 (4-C), 72.48 (3-C), 72.02 (2-C), 71.21 (5-C), 45.00 (6-C).

### Octakis-(6-chloro-6-deoxy)- $\gamma$ -cyclodextrin **1c**

Cyclodextrin **1c** was synthesized as described above with  $\gamma$ -cyclodextrin (10.11 g, 7.79 mmol) and methylsulfonyl chloride (25.28, 325.78 mmol).

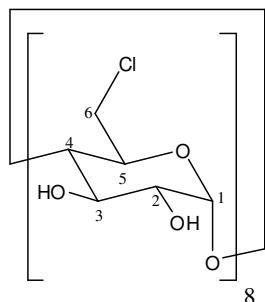

**1c**

Empirical formula (MW in g/mol): C<sub>48</sub>H<sub>72</sub>O<sub>32</sub>Cl<sub>8</sub> (1444.69)

Yield: 84 % (9.49 g, 6.57 mmol)

MS (ESI, MeOH): 743.07 [M + 2 Na]<sup>2+</sup>, 1467.13  
[M + Na]<sup>+</sup>

<sup>1</sup>H NMR (300 MHz, DMSO)  $\delta$  6.01 (s, 2H, 2,3-OH), 4.98 (d,  $J$  = 3.7, 1H, 1-H), 4.02 (d,  $J$  = 9.9, 1H, 6a-H), 3.91 – 3.74 (m, 2H, 5-H), 3.60 (t,  $J$  = 9.2, 1H, 3-H), 3.37 (dd,  $J$  = 10.0, 7.8, 2H, 6b-H).

<sup>13</sup>C NMR (101 MHz, DMSO)  $\delta$  102.04 (1-C), 83.00 (4-C), 72.36 (3-C), 72.22 (2-C), 71.14 (5-C), 45.01 (6-C).

## Synthesis of fluorinated cyclodextrins 2a – 2c

The synthesis of the 2,2,2-trifluoroethanethio-substituted cyclodextrins **2a** – **2c** from perchlorinated cyclodextrins **1a** – **1c** was performed according to the following procedure: 3 eq 2,2,2-trifluoroethanethiol per glucose unit of the cyclodextrin was dissolved in dry DMF at 0 °C and treated with 3 eq of a 60% dispersion of sodium hydride in mineral oil. After stirring for 30 min a solution of **1a** – **1c** in the minimal amount of DMF was added dropwise. The solution was stirred for 5 d at 70 °C. The solvent is concentrated and poured on water. The precipitation was collected by centrifugation, dissolved in DMF again and precipitated two times from diethyl ether. The product was vacuum-dried at 60 °C and obtained as light beige solid.

### Hexakis-(6-deoxy-6-trifluoroethanethio)- $\alpha$ -cyclodextrin 2a

Cyclodextrin **2a** was synthesized as described above with 2,2,2-trifluoroethanethiol (0.15 mL, 1.69 mmol), 60 % sodium hydride suspension in mineral oil (67 mg, 1.66 mmol) and **1a** (0.11 g, 0.10 mmol).

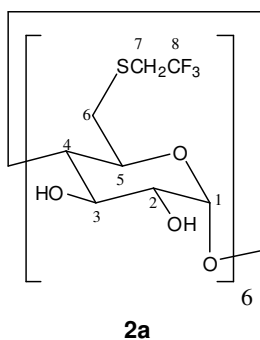

|                                  |                                                                                          |
|----------------------------------|------------------------------------------------------------------------------------------|
| Empirical formula (MW in g/mol): | C <sub>48</sub> H <sub>66</sub> O <sub>24</sub> F <sub>18</sub> S <sub>6</sub> (1516.38) |
| Yield:                           | 57 % (90 mg, 0.058 mmol)                                                                 |
| MS (ESI, MeOH):                  | 800.08 [M + Ca] <sup>2+</sup> , 1583.19 [M + Na] <sup>+</sup>                            |
| Elemental analysis               | (C <sub>48</sub> H <sub>66</sub> O <sub>24</sub> F <sub>18</sub> S <sub>6</sub> )        |
| Calculated [%]:                  | C, 36.92; H, 4.26; N, 0.0                                                                |
| Determined [%]:                  | C, 36.62; H, 4.18; N, 0.0                                                                |

<sup>1</sup>H NMR (300 MHz, DMSO)  $\delta$  5.74 (d,  $J$  = 6.1, 1H, 2-OH), 5.58 (s, 1H, 3-OH), 4.90 (s, 1H, 1-H), 3.88 (s, 1H, 5-H), 3.72 (d,  $J$  = 6.6, 1H, 3-H), 3.60 – 3.29 (m, 4H, 4, 7, 2-H), 3.16 (d,  $J$  = 12.7, 1H, 6a-H), 3.01 (d,  $J$  = 6.3, 1H, 6b-H).

<sup>13</sup>C NMR (75 MHz, DMSO)  $\delta$  126.42 (q,  $J$  = 266.3, 1C, 8-C), 101.80 (1-C), 84.60 (4-C), 72.78 (3-C), 71.69 (2-C), 71.31 (5-C), 34.13 – 33.31 (6,7-C).

<sup>19</sup>F NMR (282 MHz, DMSO)  $\delta$  -65.52 (t,  $J$  = 10.4, 3F).

### Heptakis-(6-deoxy-6-trifluoroethanethio)- $\beta$ -cyclodextrin **2b**

Cyclodextrin **2b** was synthesized as described above with 2,2,2-trifluoroethanethiol (3.7 mL, 41.5 mmol), 60 % sodium hydride suspension in mineral oil (1 g, 41.5 mmol) and **1b** (2.5 g, 1.98 mmol).

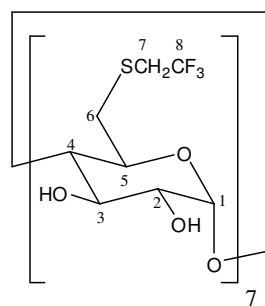

**2b**

|                                  |                                               |
|----------------------------------|-----------------------------------------------|
| Empirical formula (MW in g/mol): | $C_{56}H_{77}O_{28}F_{21}S_7$ (1820.23)       |
| Yield:                           | 88 % (3.17g, 1.74 mmol)                       |
| MS (ESI, MeOH):                  | 930.10 $[M + Ca]^{2+}$ , 1843.22 $[M + Na]^+$ |
| Elemental analysis               | ( $C_{56}H_{77}O_{28}F_{21}S_7$ )             |
| Calculated [%]:                  | C, 36.92; H, 4.26; N, 0.0                     |
| Determined [%]:                  | C, 36.57; H, 4.11; N, 0.0                     |

$^1H$  NMR (600 MHz, DMSO)  $\delta$  5.98 (d,  $J = 6.8$ , 1H, 2-OH), 5.86 (d,  $J = 1.9$ , 1H, 3-OH), 4.93 (d,  $J = 3.2$ , 1H, 1-H), 3.89 – 3.77 (m, 1H, 5-H), 3.61 (t,  $J = 9.1$ , 1H, 3-H), 3.50 – 3.39 (m, 3H, 4-, 7-H), 3.39 – 3.34 (m, 1H, 2-H), 3.17 (d,  $J = 12.3$ , 1H, 6a-H), 3.00 (dd,  $J = 14.2, 7.2$ , 1H, 6b-H).

$^{13}C$  NMR (151 MHz, DMSO)  $\delta$  126.33 (q,  $J = 276.45$ , 8-C), 102.05 (1-C), 84.22 (4-C), 72.38 (3-C), 72.06(2-C), 71.49 (5-C), 34.32 – 33.71 (6-, 7-C).

$^{19}F$  NMR (564 MHz, DMSO)  $\delta$  -65.70 (t,  $J = 10.5$ , 3F).

### **Octakis-(6-deoxy-6-trifluoroethanethio)- $\gamma$ -cyclodextrin **2c****

Cyclodextrin **2c** was synthesized as described above with 2,2,2-trifluoroethanethiol (0.15 mL, 1.66 mmol), 60 % sodium hydride suspension in mineral oil (40 mg, 1.66 mmol) and **1c** (98 mg, 0.068 mmol).

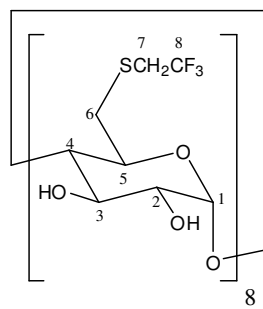

**2c**

|                                 |                                                                   |
|---------------------------------|-------------------------------------------------------------------|
| Empirical formula (MW in g/mol) | $C_{64}H_{88}O_{32}F_{24}S_8$ (2080.26)                           |
| Yield:                          | 82 % (0.12 g, 0.055 mmol)                                         |
| MS (ESI, MeOH):                 | 1060.11 [M + Ca] <sup>2+</sup> ,<br>2103.25 [M + Na] <sup>+</sup> |
| Elemental analysis              | ( $C_{64}H_{88}O_{32}F_{24}S_8$ )                                 |
| Calculated [%]:                 | C, 36.92; H, 4.26; N, 0.0                                         |
| Determined [%]:                 | C, 36.91; H, 4.22; N, 0.0                                         |

<sup>1</sup>H NMR (300 MHz, DMSO)  $\delta$  5.97 (s, 2H, 2,3-OH), 4.96 (d,  $J = 3.0$ , 1H, 1-H), 4.01 – 3.72 (m, 1H, 5-H), 3.57 (t,  $J = 9.2$ , 1H, 3-H), 3.43 (dd,  $J = 14.7$ , 6.9, 4H, 4,7,2-H), 3.17 (d,  $J = 12.4$ , 1H, 6a-H), 2.99 (dd,  $J = 13.7$ , 7.1, 1H, 6b-H).

<sup>13</sup>C NMR (75 MHz, DMSO)  $\delta$  102.09 (1-C), 83.91 (4-C), 72.31 (3-C), 72.13 (2-C), 71.63 (5-C), 33.91 (6+7-C).

<sup>19</sup>F NMR (282 MHz, DMSO)  $\delta$  -65.63 (t,  $J = 10.4$ , 3F).

## Synthesis of fluorinated cyclodextrins **3a** – **3c**

Fluorinated cyclodextrins **3a** – **3c** were synthesized according to the following procedure: cyclodextrin **2a** – **2c** was solved in dry DMF and treated with 1.5 eq sodium hydride per glucose unit of the cyclodextrin. After stirring for 1 h at room temperature, 3 eq triethylene glycol toluenesulfonate ester per glucose unit was added dropwise. The mixture was stirred for 2 d at room temperature. The solvent was removed and the raw product purified by size exclusion chromatography on a Sephadex LH-20 column. The product was dried at 60 °C in vacuum and obtained as brown highly viscous oil.

### **Hexakis-(2-O-(2-(2-(2-hydroxyethoxy)ethoxy)ethyl), 6-deoxy-6-trifluoroethanethio)- $\alpha$ -cyclodextrin **3a****

Cyclodextrin **3a** was synthesized as described above with **2a** (0.2 g, 0.13 mmol), sodium hydride (46 mg, 1.18 mmol) and triethylene glycol toluenesulfonate ester (0.95 g, 3.14 mmol).

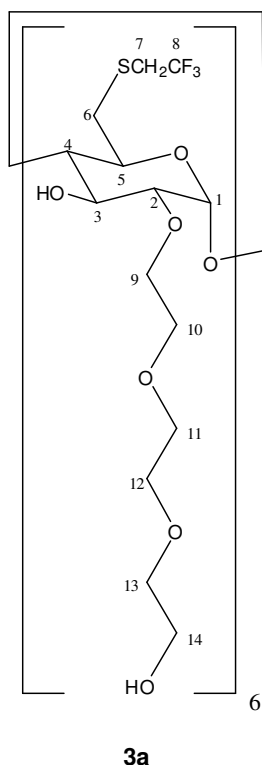

Empirical Formula (MW in g/mol): C<sub>84</sub>H<sub>138</sub>F<sub>18</sub>O<sub>42</sub>S<sub>6</sub> (2354.33)

Yield: 100 % (0.31g, 0.13 mmol)

MS (ESI, MeOH): 1397.93 [M<sub>EO27</sub> + 2 Na]<sup>2+</sup>, 1331.90 [M<sub>EO24</sub> + 2 Na]<sup>2+</sup>, 1265.86 [M<sub>EO21</sub> + 2 Na]<sup>2+</sup>, 1199.32 [M<sub>EO18</sub> + 2 Na]<sup>2+</sup>, 1133.28 [M<sub>EO15</sub> + 2 Na]<sup>2+</sup>, 1067.24 [M<sub>EO12</sub> + 2 Na]<sup>2+</sup>, 2243.58 [M<sub>EO15</sub> + Na]<sup>+</sup>, 2375.66 [M<sub>EO18</sub> + Na]<sup>+</sup>, 2508.74 [M<sub>EO21</sub> + Na]<sup>2+</sup>

Elemental analysis (C<sub>84</sub>H<sub>138</sub>O<sub>42</sub>F<sub>18</sub>S<sub>6</sub>)

Calculated [%]: C, 42.85; H, 5.91; N, 0.0

Determined [%]: C, 43.05; H, 5.75; N, 0.0

<sup>1</sup>H NMR (300 MHz, CDCl<sub>3</sub>)  $\delta$  4.90 (d, J = 22.9, 1H, 1-H), 4.82 – 4.55 (m, 1H, 3-OH), 4.02 (dd, J = 18.0, 9.8, 2H, 3-H, 5-H), 3.92 – 3.71 (m, 2H, 14-H), 3.56 (dd, J = 18.7, 6.4, 11H, 9-H, 10-H), 3.45 – 3.30 (m, 2H, 2-H, 4-H), 3.20 (dd, J = 27.2, 18.0, 4H, 6a-H, 7-H), 2.90 (dd, J = 14.7, 5.3, 1H, 6b-H).

<sup>13</sup>C NMR (75 MHz, CDCl<sub>3</sub>)  $\delta$  126.09 (q, J = 276.1, 8-C), 101.00 (1-C), 86.17 (4-C), 80.54 (2-C), 77.65 - 70.39 (9-C, 10-C, 11-C, 12-C, 13-C), 61.65 (14-C), 35.39 - 34.36 (6-C, 7-C).

<sup>19</sup>F NMR (282 MHz, CDCl<sub>3</sub>)  $\delta$  -66.38 (t, J = 9.9, 3F).

**Heptakis-(2-O-(2-(2-(2-hydroxyethoxy)ethoxy)ethyl), 6-deoxy-6-trifluoroethanethio)- $\beta$ -cyclodextrin **3b****

Cyclodextrin **3b** was synthesized as described above with **2b** (95 mg, 0.052 mmol), sodium hydride (13.2 mg, 0.55 mmol) and triethylene glycol toluenesulfonate ester (0.45 g, 1.46 mmol).

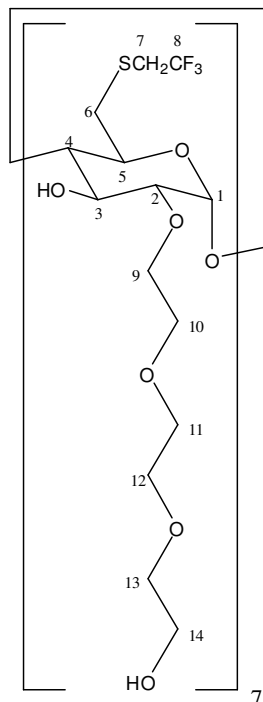

**3b**

Empirical Formula (MW in g/mol): C<sub>98</sub>H<sub>161</sub>F<sub>21</sub>O<sub>49</sub>S<sub>7</sub> (2744.78)

Yield: 108 % (0.14 g, 0.06 mmol)

MS (ESI, MeOH): 893.89 [M<sub>EO18</sub> + 3 Na]<sup>3+</sup>, 938.25 [M<sub>EO21</sub> + 3 Na]<sup>3+</sup>, 982.28 [M<sub>EO24</sub> + 3 Na]<sup>3+</sup>, 1026.64 [M<sub>EO27</sub> + 3 Na]<sup>3+</sup>, 1070.33 [M<sub>EO30</sub> + 3 Na]<sup>3+</sup>, 1114.68 [M<sub>EO33</sub> + 3 Na]<sup>3+</sup>, 1263.31 [M<sub>EO15</sub> + 2 Na]<sup>2+</sup>, 1329.84 [M<sub>EO18</sub> + 2 Na]<sup>2+</sup>, 1395.88 [M<sub>EO21</sub> + 2 Na]<sup>2+</sup>, 1462.42 [M<sub>EO24</sub> + 2 Na]<sup>2+</sup>, 1528.46 [M<sub>EO27</sub> + 2 Na]<sup>2+</sup>, 1593.99 [M<sub>EO30</sub> + 2 Na]<sup>2+</sup>

Elemental analysis (C<sub>98</sub>H<sub>161</sub>O<sub>49</sub>F<sub>21</sub>S<sub>7</sub>)

Calculated [%]: C, 42.85; H, 5.91; N, 0.0

Determined [%]: C, 42.63; H, 6.12; N, 0.0

<sup>1</sup>H NMR (300 MHz, CDCl<sub>3</sub>)  $\delta$  4.99 (d, J = 3.2, 1H, 1-H), 4.91 (s, 1H, 3-OH), 4.11 (dd, J = 7.4, 3.6, 2H, 3-H, 5-H), 3.84 (dd, J = 17.9, 9.9, 5H, 14-H), 3.74 – 3.50 (m, 20H, 9-H, 10-H, 11-H, 12-H, 13-H), 3.40 (dt, J = 12.8, 6.4, 3H, 2-H, 4-H), 3.20 (dd, J = 17.2, 7.6, 6H, 6a-H, 7-H), 2.93 (dd, J = 14.1, 6.7, 1H, 6b-H).

<sup>13</sup>C NMR (75 MHz, CDCl<sub>3</sub>)  $\delta$  126.14 (q, J = 276.1, 8-C), 101.37 (1-C), 85.76 (4-C), 81.08 (2-C), 73.17 - 70.49 (3-C, 5-C, 9-C, 10-C, 11-C, 12-C, 13-C), 61.78 (14-C), 35.51 - 34.29 (6-C, 7-C).

<sup>19</sup>F NMR (282 MHz, CDCl<sub>3</sub>)  $\delta$  -66.64 (t, J = 9.7, 3F).



**Octakis-(2-O-(2-(2-(2-hydroxyethoxy)ethoxy)ethyl), 6-deoxy-6-trifluoroethanethio)- $\gamma$ -cyclodextrin **3c****

Cyclodextrin **3c** was synthesized as described above with **2c** (113 mg, 0.054 mmol), sodium hydride (15.6 mg, 0.65 mmol) and triethylene glycol toluenesulfonate ester (0.53 g, 1.74 mmol).

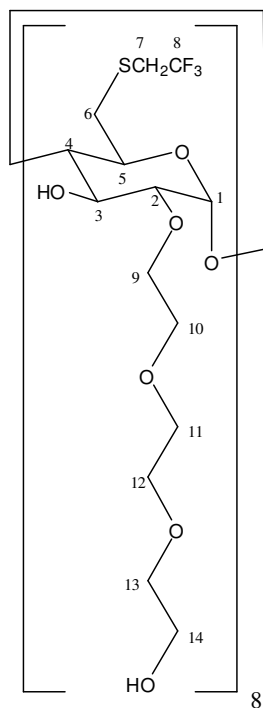

**3c**

Empirical Formula (MW in g/mol): C<sub>112</sub>H<sub>184</sub>F<sub>24</sub>O<sub>56</sub>S<sub>8</sub> (3139,11)

Yield: 78 % (133 mg, 0.04 mmol)

MS (ESI, MeOH): 981.23 [M<sub>EO18</sub> + 3 Na]<sup>3+</sup>, 1024.93[M<sub>EO21</sub> + 3 Na]<sup>3+</sup>, 1069.29 [M<sub>EO24</sub> + 3 Na]<sup>3+</sup>, 1113.32 [M<sub>EO27</sub> + 3 Na]<sup>3+</sup>, 1157.34 [M<sub>EO30</sub> + 3 Na]<sup>3+</sup>, 1201.36 [M<sub>EO33</sub> + 3 Na]<sup>3+</sup>, 1393.82 [M<sub>EO15</sub> + 2 Na]<sup>2+</sup>, 1459.86 [M<sub>EO18</sub> + 2 Na]<sup>2+</sup>, 1525.90 [M<sub>EO21</sub> + 2 Na]<sup>2+</sup>, 1592.44 [M<sub>EO24</sub> + 2 Na]<sup>2+</sup>, 1658.48 [M<sub>EO27</sub> + 2 Na]<sup>2+</sup>

Elemental analysis (C<sub>112</sub>H<sub>184</sub>O<sub>56</sub>F<sub>24</sub>S<sub>8</sub>)

Calculated [%]: C, 42.85; H, 5.91; N, 0.0

Determined [%]: C, 42.81; H, 5.97; N, 0.0

<sup>1</sup>H NMR (300 MHz, CDCl<sub>3</sub>)  $\delta$  5.05 (d, J = 3.4, 1H, 1-H), 4.93 (s, 1H, 3-OH), 4.19 – 3.99 (m, 1H, 3-H), 3.99 – 3.48 (m, 13H, 5-H, 9-H, 10-H, 11-H, 12-H, 13-H, 14-H), 3.41 (s, 3H, 2-H, 4-H), 3.19 (dd, J = 18.9, 9.4, 3H, 6a-H, 7-H), 3.00 – 2.89 (m, 1H, 6b-H).

<sup>13</sup>C NMR (101 MHz, CDCl<sub>3</sub>)  $\delta$  126.12 (dd, J = 552.6, 276.7, 8-C), 100.99 (1-C), 84.81 (4-C), 81.27 (2-C), 72.94 - 70.31, 61.67 (14-C), 35.36 - 34.18 (6-C, 7-C).

<sup>19</sup>F NMR (282 MHz, CDCl<sub>3</sub>)  $\delta$  -66.67 (t, J = 9.7, 3F).

## Isothermal Titration Calorimetry

Isothermal titration calorimetry (ITC) was performed on a *Nano-Isothermal Titration Calorimeter III (Model CSC 5300)* made by *Calorimetry Sciences Corporation (USA)*. Analyte solutions for ITC measurements were prepared with distilled and deionized water and degassed for 20 min at room temperature. The guest solution (10-fold excess) was titrated into the cyclodextrin solution. 20 injections of 10  $\mu\text{L}$  were performed with an interval of 300 s. The stirring rate was 300 rpm. The data were fitted to a 1:1 model (2:1 in case of diflunisal and **3c**) using a spread sheet method.<sup>2</sup>

**Table S1:** Analyte solutions for ITC with  $\alpha$ -cyclodextrin **3a**.

| compound                        | M<br>[g/mol] | n<br>[mmol] | m<br>[mg] | c<br>[mM] |
|---------------------------------|--------------|-------------|-----------|-----------|
| CD 3a                           | 2354,33      | 0,0551      | 129,7     | 5,509     |
| <i>p</i> -fluorophenol          | 112,1        | 0,275       | 31        | 55,09     |
| <i>p</i> -trifluoromethylphenol | 162,11       | 0,275       | 44,8      | 55,09     |
| <i>m</i> -trifluormethylphenol  | 162,11       | 0,275       | 44,7      | 55,09     |
| phenol                          | 94,11        | 0,25        | 23,4      | 50        |
| <i>p</i> -cresol                | 108,14       | 0,275       | 29,7      | 55        |

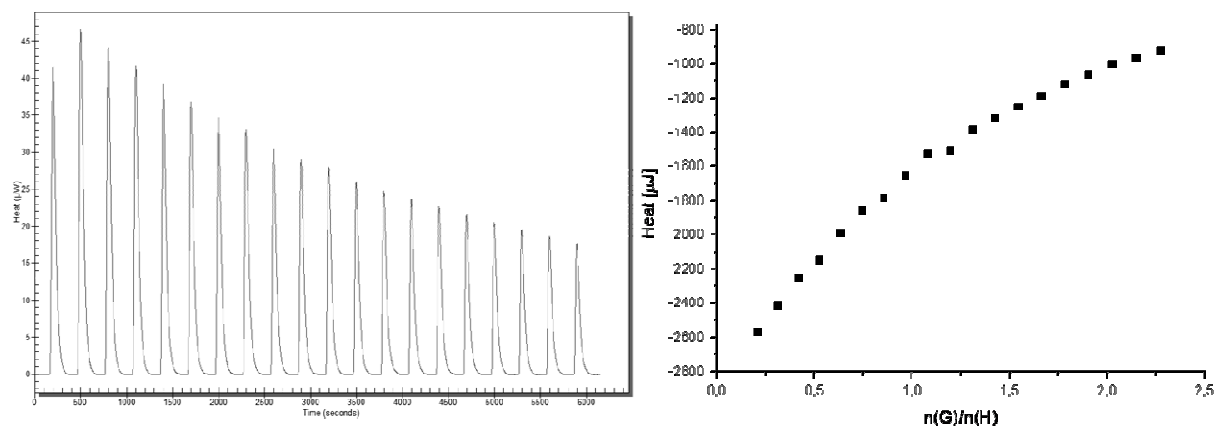

**Figure S1:** ITC of **3a** with *p*-fluorophenol.

<sup>2</sup> J. Huskens, H. van Bekkum and J. A. Peters, *Computers & Chemistry*, 1995, 19, 409.

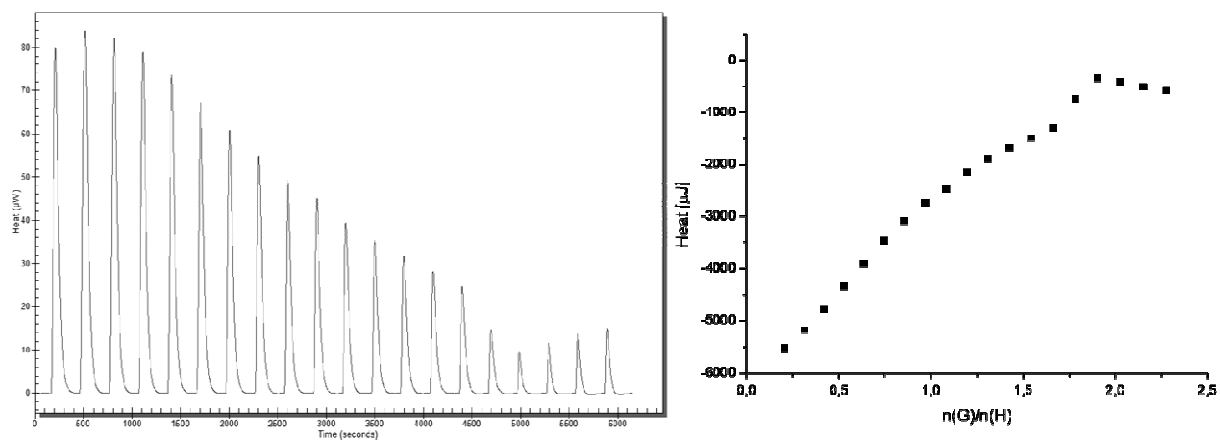

**Figure S2:** ITC of **3a** with p-trifluoromethylphenol.

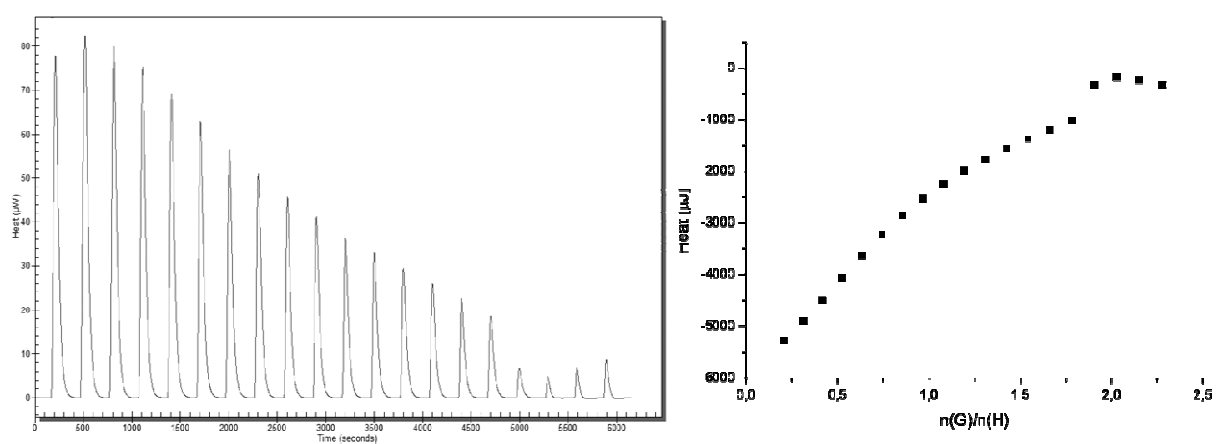

**Figure S3:** ITC data of **3a** with m-trifluoromethylphenol.

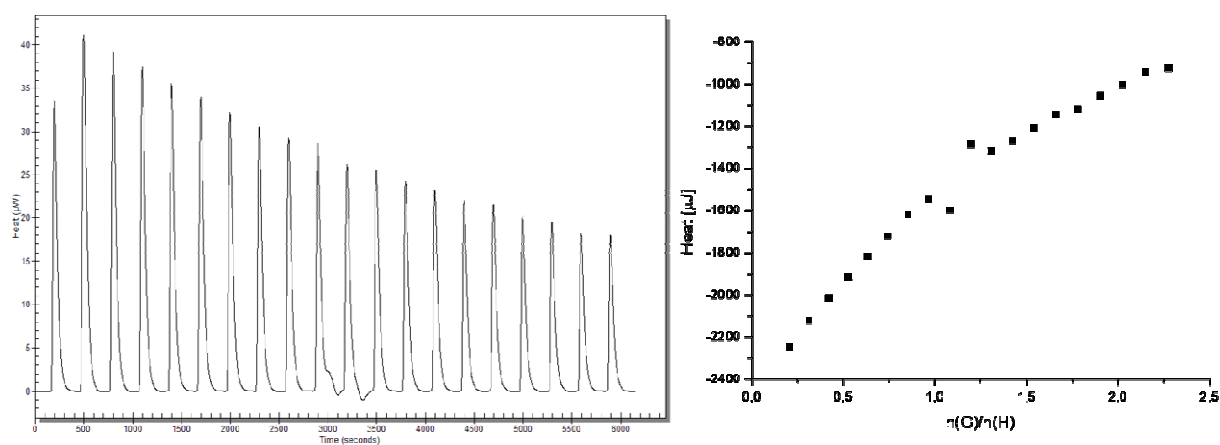

**Figure S4:** ITC of **3a** with phenol.

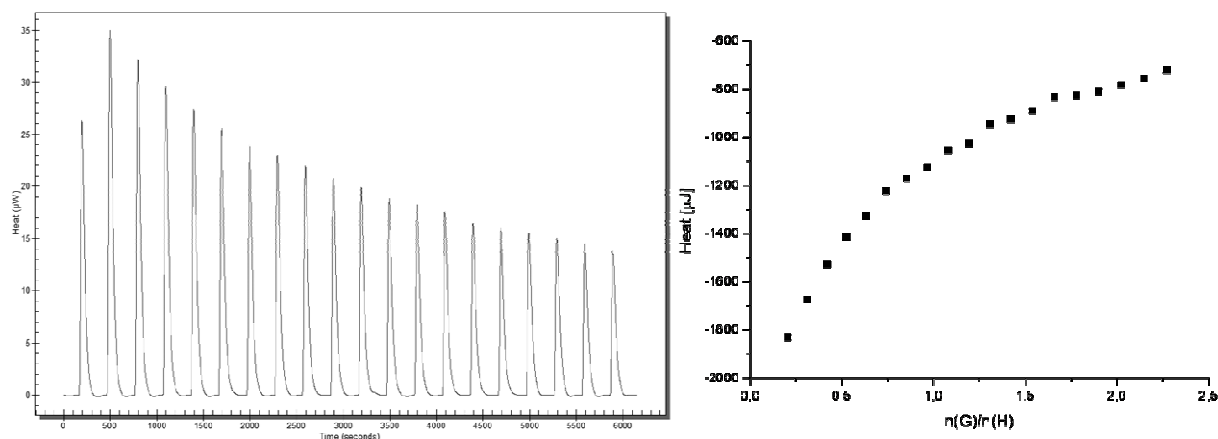

Figure S5: ITC of **3a** with p-cresol.

Table S2: Analyte solutions for ITC with  $\beta$ -cyclodextrin **3b**.

| compound                                      | M<br>[g/mol] | n<br>[mmol] | m<br>[mg] | c<br>[mM] |
|-----------------------------------------------|--------------|-------------|-----------|-----------|
| CD <b>3b</b>                                  | 2744,78      | 0,055       | 151       | 5,5       |
| <i>p</i> -fluorophenol                        | 112,1        | 0,275       | 30,8      | 55        |
| <i>p</i> -trifluoromethylphenol               | 162,11       | 0,275       | 44,7      | 55        |
| CD <b>3b</b>                                  | 2744,78      | 0,05        | 137,3     | 5         |
| <i>m</i> -trifluoromethylphenol               | 162,11       | 0,275       | 40,5      | 50        |
| phenol                                        | 94,11        | 0,25        | 23,4      | 50        |
| <i>p</i> -cresol                              | 108,14       | 0,25        | 27,1      | 50        |
| CD <b>3b</b>                                  | 2744,78      | 0,008       | 22,9      | 1,67      |
| 4-(trifluoromethyl)cyclohexanecarboxylic acid | 196,17       | 0,25        | 49        | 16,7      |
| CD <b>3b</b>                                  | 2744,78      | 0,0096      | 26,4      | 1,6       |
| 4-methylcyclohexanecarboxylic acid            | 142,196      | 0,08        | 11,4      | 16        |
| CD <b>3b</b>                                  | 2744,78      | 0,015       | 41,8      | 3         |
| diflunisal                                    | 250,198      | 0,15        | 37,8      | 30        |

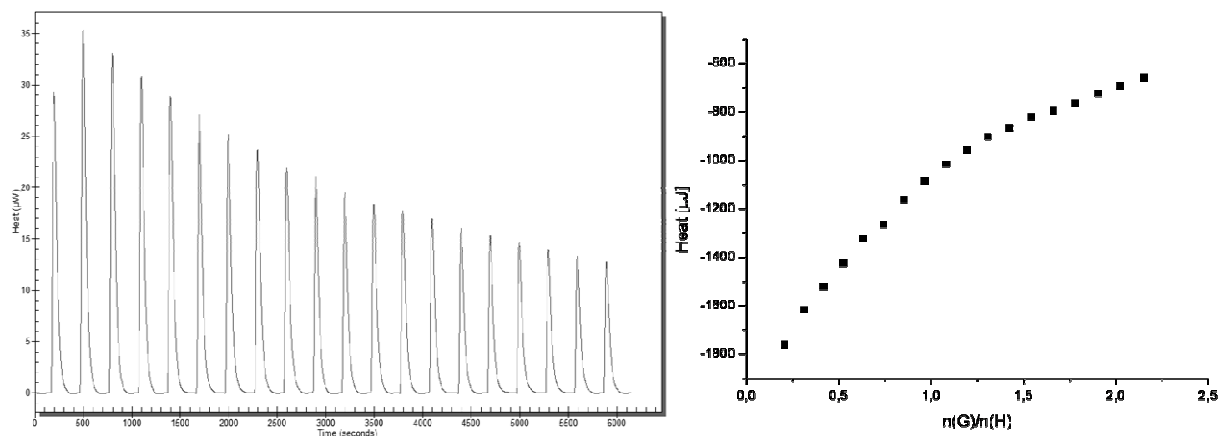

Figure S6: ITC of **3b** with p-fluorophenol.

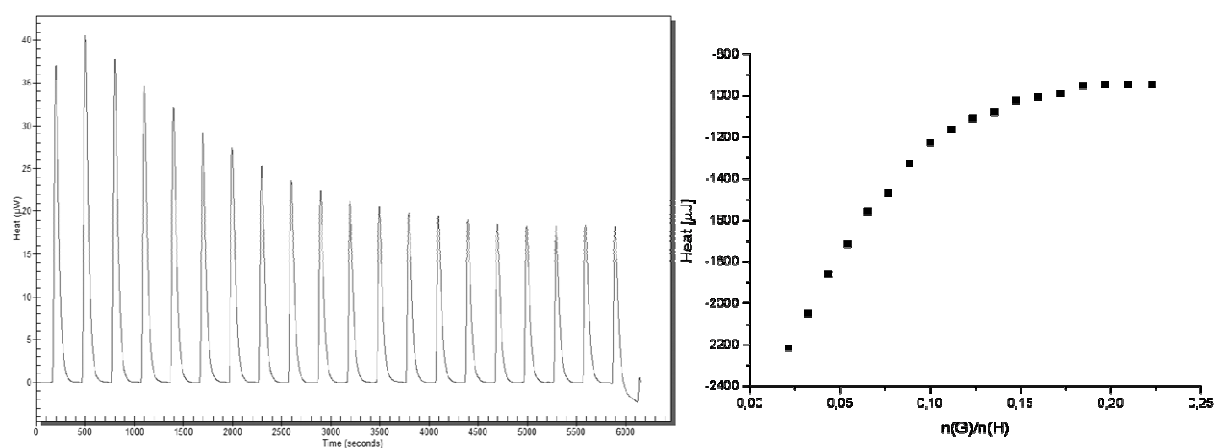

Figure S7: ITC of **3b** with p-trifluoromethylphenol.

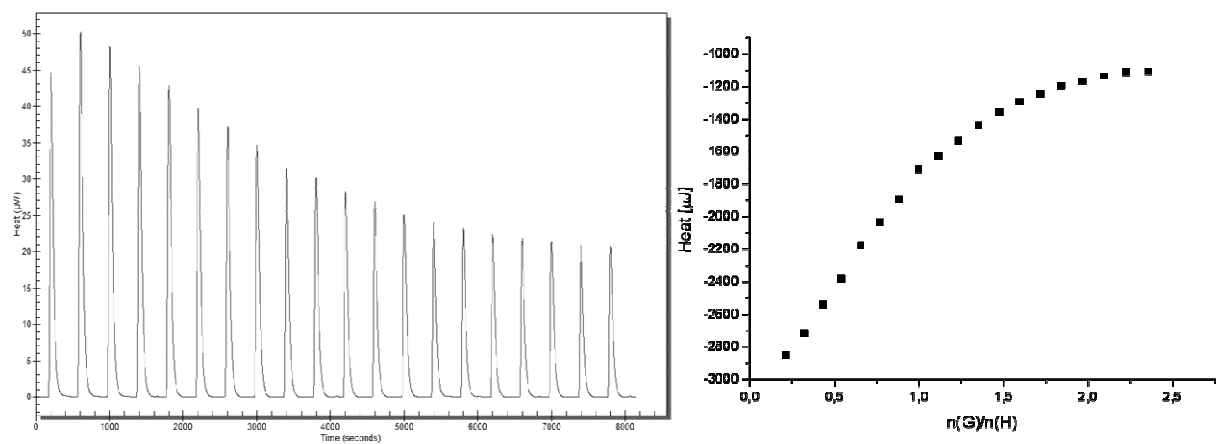

Figure S8: ITC of **3b** with m-trifluoromethylphenol.

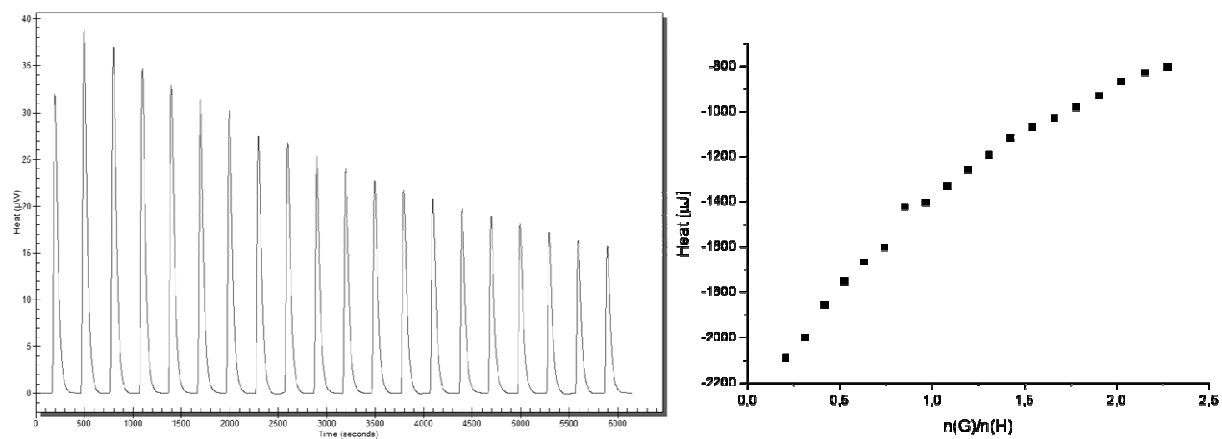

Figure S9: ITC of **3b** with phenol.

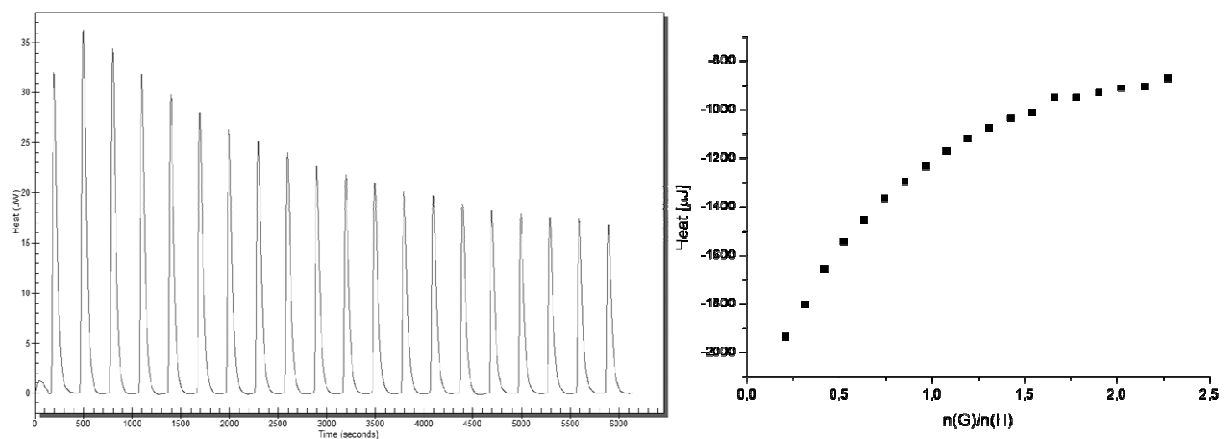

**Figure S10:** ITC of **3b** with p-cresol.

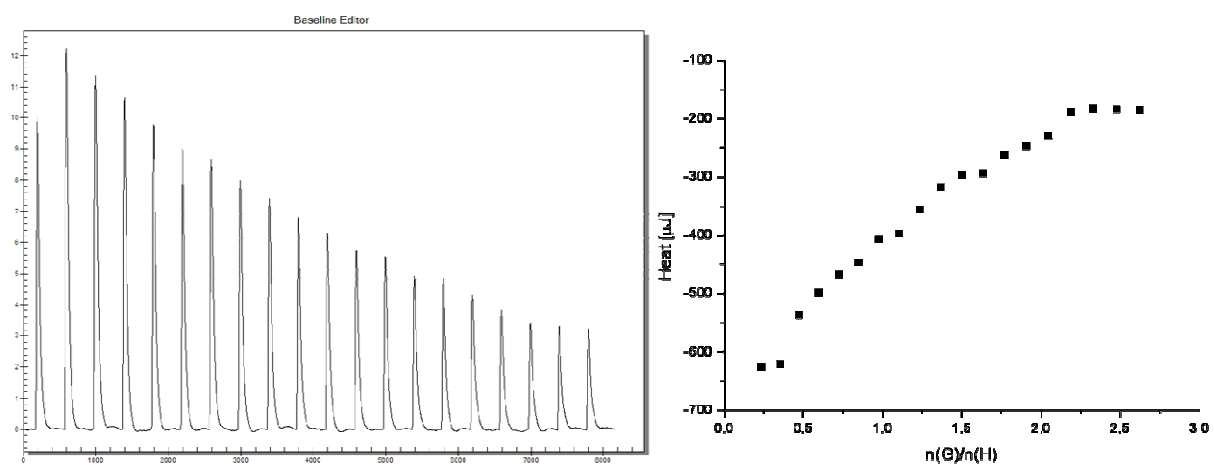

**Figure S11:** ITC of **3b** with 4-(trifluoromethyl)cyclohexane carboxylic acid.

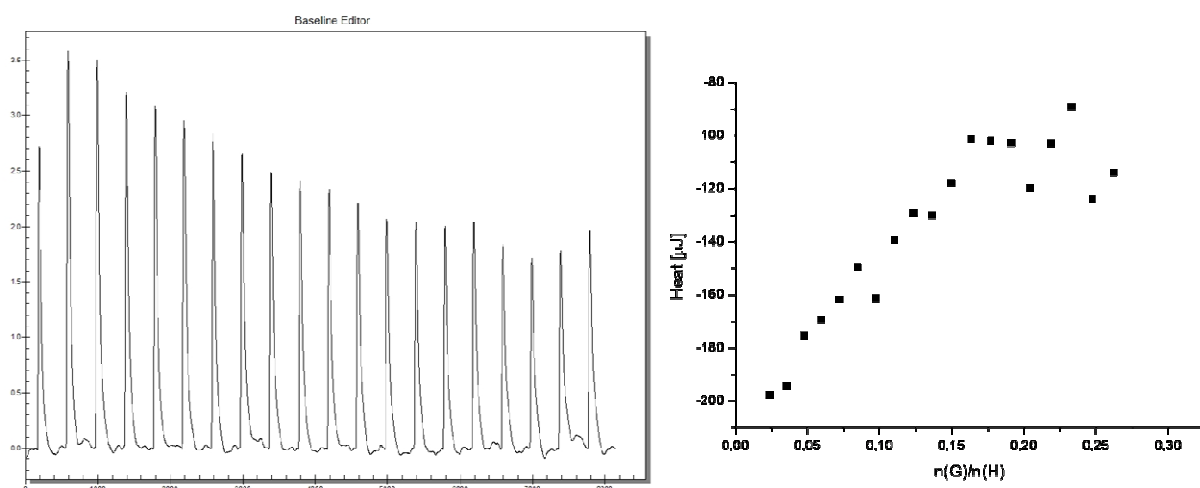

**Figure S12:** ITC of **3b** with 4-methylcyclohexane carboxylic acid.

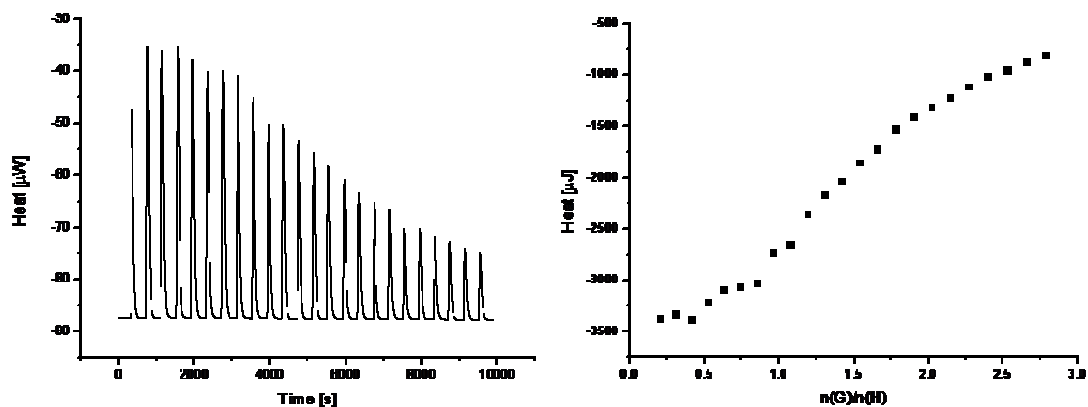

Figure S13: ITC of **3b** with diflunisal in borate buffer at pH 9.

Table S3: Analyte solutions for ITC with  $\gamma$ -cyclodextrin **3c**.

| Compound     | M<br>[ <sup>g</sup> /mol] | n<br>[mmol] | m<br>[mg] | c<br>[mM] |
|--------------|---------------------------|-------------|-----------|-----------|
| CD <b>3c</b> | 3139,11                   | 0,01        | 31,4      | 1         |
| diflunisal   | 250,198                   | 0,15        | 37,9      | 30        |

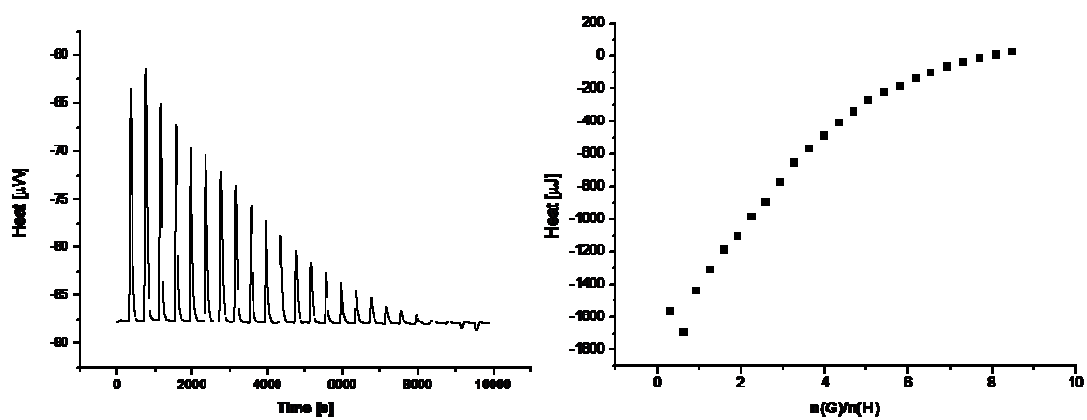

Figure S14: ITC of **3c** with diflunisal in borate buffer at pH 9.

## NMR Titration

### *NMR titration of cyclodextrin 3b with p-trifluoromethylphenol*

NMR titration of  $\beta$ -cyclodextrin **3b** with *p*-trifluoromethylphenol is characterized by a fast exchange of free and complexed guest relative to the NMR time-scale. The NMR spectrum displays an average ( $\delta_{obs}$ ) of the shift of free ( $\delta_G$ ) and complexed guests ( $\delta_C$ ):

$$\begin{aligned}\delta_{obs} &= \delta_G(1-x) + x\delta_C & x &= \frac{[C]}{[G]_0} \\ x &= \frac{\delta_{obs} - \delta_G}{\delta_C - \delta_G} & [C] &= x[G]_0\end{aligned}$$

The shift of complexed guest ( $\delta_C$ ) was obtained from NMR titrations and extrapolation. In view of the small shifts observed in  $^1\text{H-NMR}$ , only  $^{19}\text{F-NMR}$  data (Table S4) were used to determine complex stoichiometry (Job's Plot) and binding constant  $K_a$ . Once  $\delta_C$  is known, the concentration of the complex in equilibrium can be determined and the equilibrium constant  $K$  can be calculated according to:

$$\begin{aligned}K &= \frac{[C]}{[G][CD]} \\ K &= \frac{[C]}{([G]_0 - [C])([CD]_0 - [C])}\end{aligned}$$

(with  $[G]_0$  = guest concentration and  $[CD]_0$  = cyclodextrin concentration)



**Table S4:**  $^{19}\text{F}$ -NMR data for the titration of cyclodextrin **3b** with *p*-trifluoromethylphenol.

| $^{19}\text{F}$ -NMR |                                  |                                 |                                         |                                        |                |                |                  |              |
|----------------------|----------------------------------|---------------------------------|-----------------------------------------|----------------------------------------|----------------|----------------|------------------|--------------|
| sample               | $\Delta_{\text{guest}}$<br>[ppm] | $\Delta_{\text{host}}$<br>[ppm] | $\Delta \delta_{\text{guest}}$<br>[ppm] | $\Delta \delta_{\text{host}}$<br>[ppm] | n(G)<br>[mmol] | n(H)<br>[mmol] | n(G)/(n(G)+n(H)) | ratio<br>G:H |
| 1                    | 0                                | -66,81                          | 0                                       | 0                                      | 0              | 0,0036         | 0,000            | 00:01        |
| 2                    | -60,72                           | -66,83                          | 0,46                                    | -0,02                                  | 0,0003         | 0,0033         | 0,083            | 01:11        |
| 3                    | -60,74                           | -66,86                          | 0,44                                    | -0,05                                  | 0,0006         | 0,003          | 0,167            | 02:10        |
| 4                    | -60,76                           | -66,89                          | 0,42                                    | -0,08                                  | 0,0009         | 0,0027         | 0,250            | 01:03        |
| 5                    | -60,8                            | -66,91                          | 0,38                                    | -0,1                                   | 0,0012         | 0,0024         | 0,333            | 01:02        |
| 6                    | -60,83                           | -66,94                          | 0,35                                    | -0,13                                  | 0,0015         | 0,0021         | 0,417            | 05:07        |
| 7                    | -60,87                           | -66,97                          | 0,31                                    | -0,16                                  | 0,0018         | 0,0018         | 0,500            | 01:01        |
| 8                    | -60,93                           | -67                             | 0,25                                    | -0,19                                  | 0,0021         | 0,0015         | 0,583            | 07:05        |
| 9                    | -60,99                           | -67,03                          | 0,19                                    | -0,22                                  | 0,0024         | 0,0012         | 0,667            | 02:01        |
| 10                   | -61,06                           | -67,05                          | 0,12                                    | -0,24                                  | 0,0027         | 0,0009         | 0,750            | 03:01        |
| 11                   | -61,1                            | -67,09                          | 0,08                                    | -0,28                                  | 0,003          | 0,0006         | 0,833            | 10:02        |
| 12                   | -61,16                           | -67,16                          | 0,02                                    | -0,35                                  | 0,0033         | 0,0003         | 0,917            | 11:01        |
| 13                   | -61,18                           | 0                               | 0                                       | 0                                      | 0,0036         | 0              | 1,000            | 01:00        |

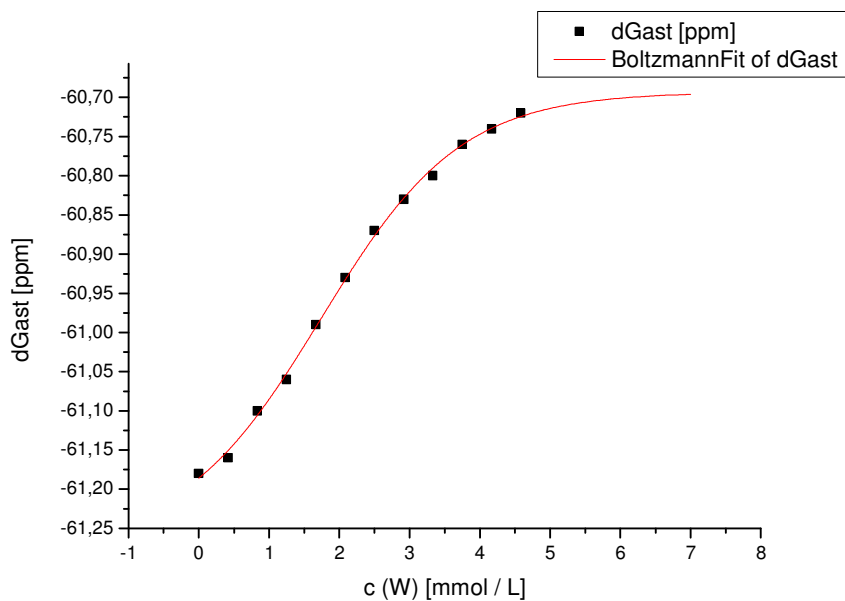

**Figure S15:** Determination of  $\delta_{\text{C}}$ .

The shift of the inclusion complex  $\delta_{\text{C}} = -60.7$  is obtained from extrapolation of  $^{19}\text{F}$ -NMR data (Figure S15). A fit for 1:1 complexation gives a binding constant  $K_{\text{a}} = 2.06 \times 10^3 \text{ M}^{-1}$ .

### NMR titration of cyclodextrin **3a** with *p*-trifluoromethylphenol

NMR titration of  $\alpha$ -cyclodextrin **3a** with *p*-trifluoromethylphenol was carried out as described for **3b**.

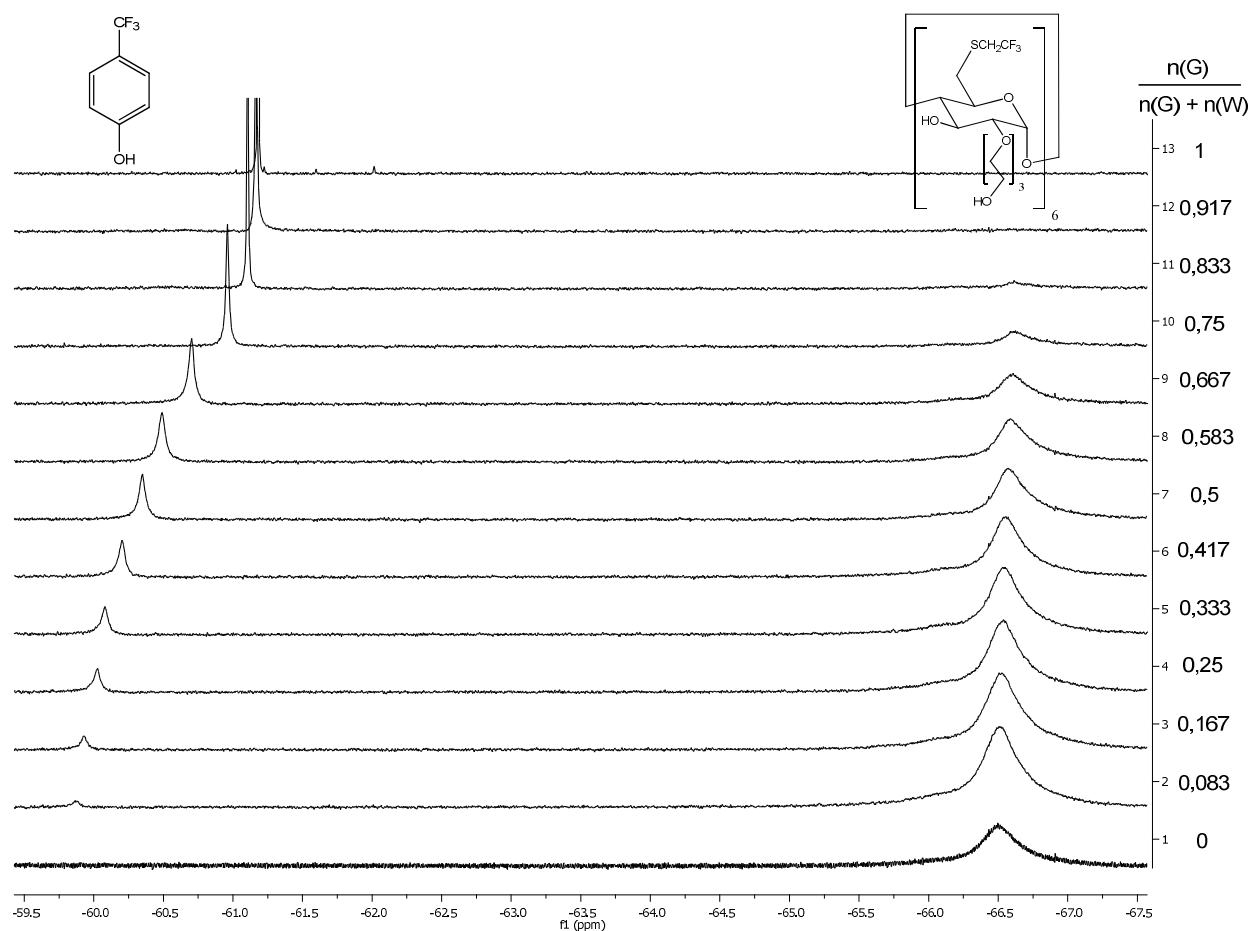

Figure S16:  $^{19}\text{F}$ -NMR titration spectra of **2a** with *p*-trifluoromethylphenol.

**Table S5:**  $^{19}\text{F}$ -NMR data for the titration of  $\alpha$ -CD **2a** with *p*-trifluoromethylphenol.

| $^{19}\text{F}$ -NMR |                                  |                                 |                                         |                                        |                |                |                  |              |
|----------------------|----------------------------------|---------------------------------|-----------------------------------------|----------------------------------------|----------------|----------------|------------------|--------------|
| sample               | $\Delta_{\text{quest}}$<br>[ppm] | $\Delta_{\text{host}}$<br>[ppm] | $\Delta \delta_{\text{quest}}$<br>[ppm] | $\Delta \delta_{\text{host}}$<br>[ppm] | n(G)<br>[mmol] | n(H)<br>[mmol] | n(G)/(n(G)+n(H)) | ratio<br>G:H |
| 1                    | -                                | -66,49                          | -                                       | 0                                      | 0              | 0,0036         | 0                | 00:01        |
| 2                    | -59,87                           | -66,51                          | 1,31                                    | -0,02                                  | 0,0003         | 0,0033         | 0,083            | 01:11        |
| 3                    | -59,93                           | -66,52                          | 1,25                                    | -0,03                                  | 0,0006         | 0,003          | 0,167            | 02:10        |
| 4                    | -60,02                           | -66,53                          | 1,16                                    | -0,04                                  | 0,0009         | 0,0027         | 0,25             | 01:03        |
| 5                    | -60,08                           | -66,55                          | 1,1                                     | -0,06                                  | 0,0012         | 0,0024         | 0,333            | 01:02        |
| 6                    | -60,2                            | -66,55                          | 0,98                                    | -0,06                                  | 0,0015         | 0,0021         | 0,417            | 05:07        |
| 7                    | -60,35                           | -66,57                          | 0,83                                    | -0,08                                  | 0,0018         | 0,0018         | 0,5              | 01:01        |
| 8                    | -60,49                           | -66,59                          | 0,69                                    | -0,1                                   | 0,0021         | 0,0015         | 0,583            | 07:05        |
| 9                    | -60,7                            | -66,61                          | 0,48                                    | -0,12                                  | 0,0024         | 0,0012         | 0,667            | 02:01        |
| 10                   | -60,96                           | -66,62                          | 0,22                                    | -0,13                                  | 0,0027         | 0,0009         | 0,75             | 03:01        |
| 11                   | -61,11                           | -66,61                          | 0,07                                    | -0,12                                  | 0,003          | 0,0006         | 0,833            | 10:02        |
| 12                   | -61,17                           | -                               | 0,01                                    | -                                      | 0,0033         | 0,0003         | 0,917            | 11:01        |
| 13                   | -61,18                           | -                               | 0                                       | -                                      | 0,0036         | 0              | 1                | 01:00        |

The complex stoichiometry of **3a** with *p*-trifluoromethylphenol was determined by plotting guest shift signals multiplied by molar amount against ratio of guest and host in a Job's Plot (see Figure S1).

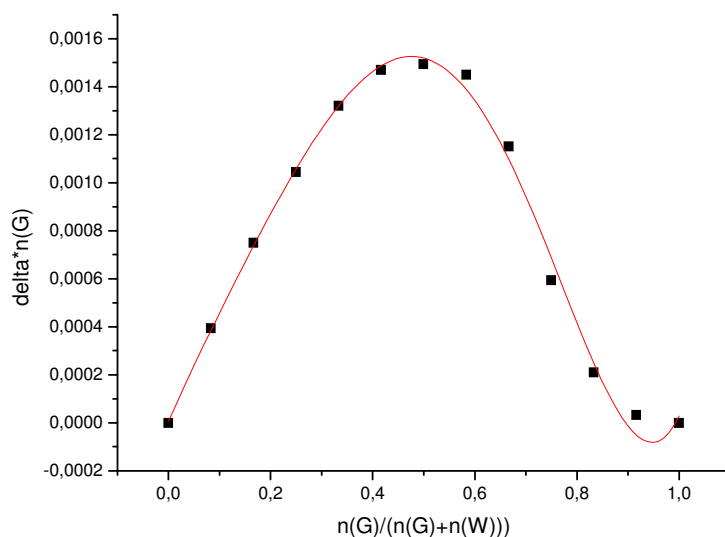

**Figure S17:** Job's plot for the titration of **3a** with *p*-trifluoromethylphenol.

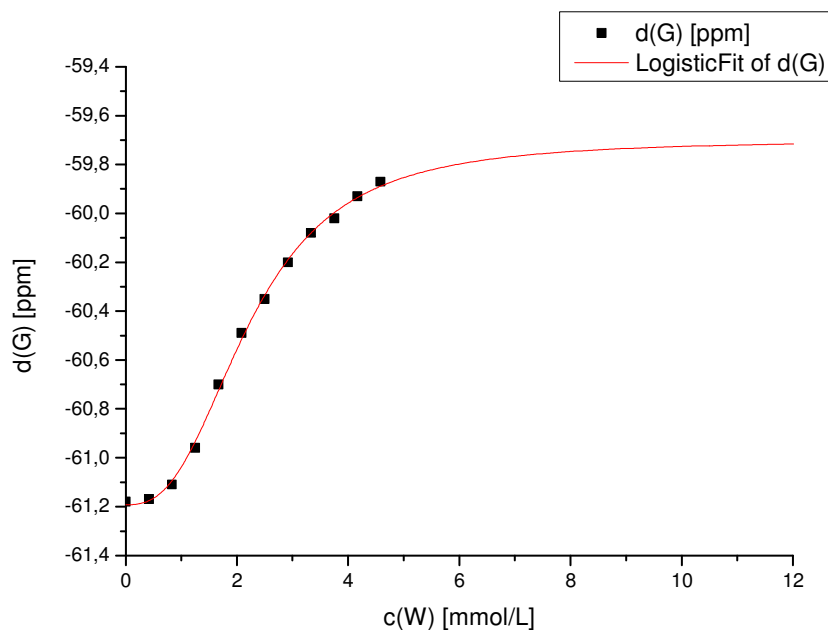

**Figure S18:** Determination of  $\delta_C$  by extrapolation of  $^{19}\text{F}$ -NMR data.

The  $^{19}\text{F}$ -NMR data of **3a** were extrapolated to obtain  $\delta_C = -59.72$  ppm (see Figure S18). A fit for 1:1 complexation gives a binding constant  $K_a = 1.37 \times 10^2 \text{ M}^{-1}$ .

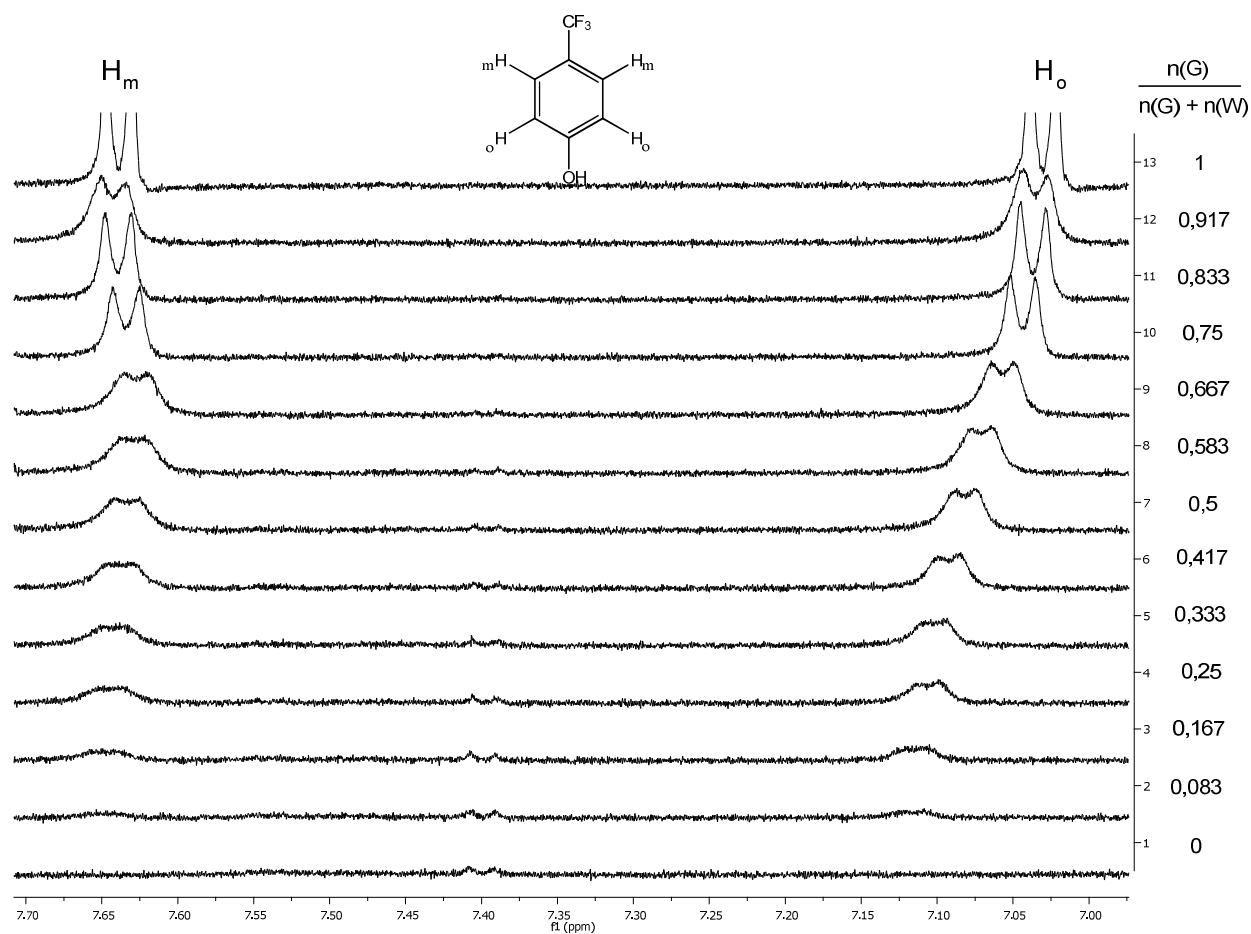

**Figure S19:**  $^1\text{H}$ -NMR titration of **3a** with p-trifluoromethylphenol.
